# Supplementary material for: Natural clay-supported palladium catalysts for methane oxidation reaction: effect of alloying
Source: Royal Society of Chemistry journal article supplement (doi:10.1039/c9ra06804j), 2019-01-01
Supplement: c9ra06804j1.pdf [file c9ra06804j1.pdf]

## Natural Clay-Supported Palladium Catalysts for Methane Oxidation Reaction: Effect of Alloying

Yahia H. Ahmad,<sup>a</sup> Assem T. Mohamed,<sup>a</sup> Khaled A. Mahmoud,<sup>b</sup> Amina S. Aljaber,<sup>a</sup> and  
Siham Y. Al-Qaradawi<sup>\*,a</sup>

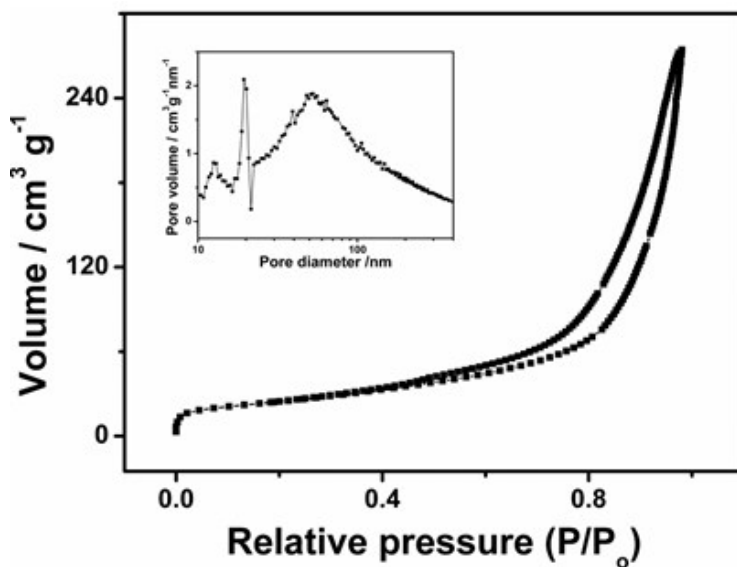

Fig. S1. N<sub>2</sub> Adsorption-desorption isotherms over pristine halloysite nanotubes

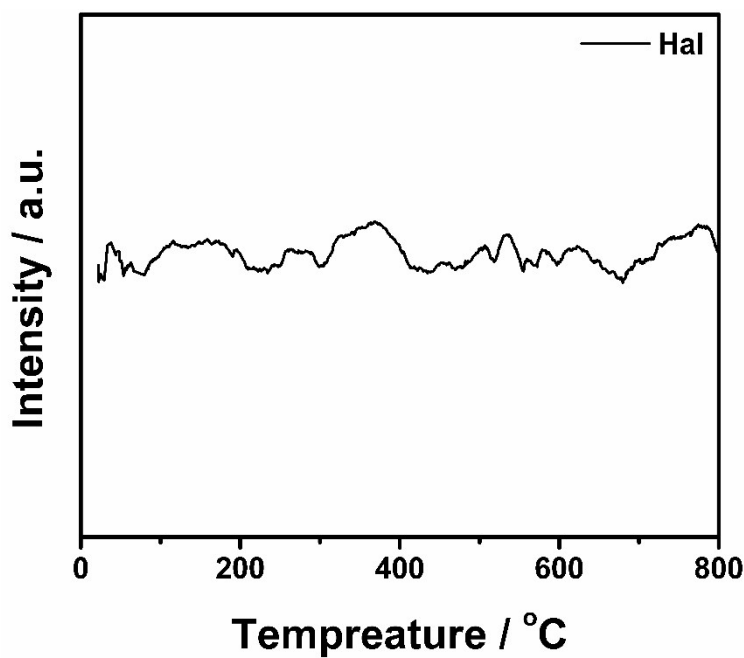

Fig. S2. H<sub>2</sub>-TPR profile of halloysite nanotubes

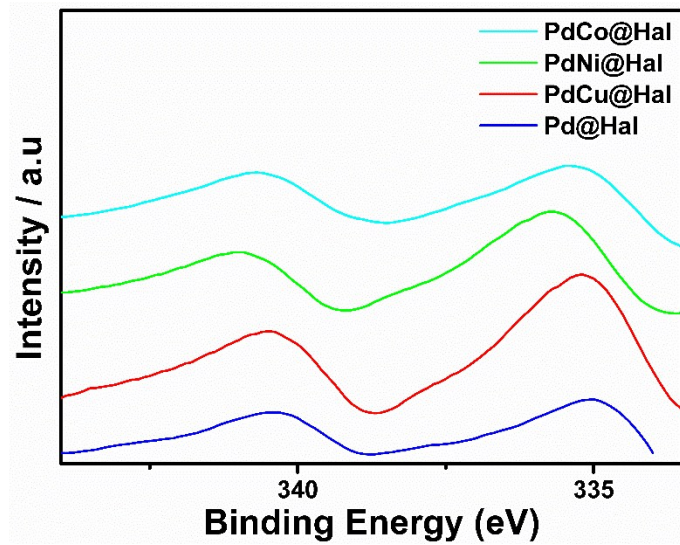

**Fig. S3.** High resolution XPS spectra of Pd 3d in different as-synthesized catalysts
